# Supplementary material for: Pressure effects on both fluorescent emission and charge transport properties of organic semiconductors: a computational study
Source: Royal Society of Chemistry journal article supplement (doi:10.1039/d3cp03852a), 2023-12-05
Supplement: d3cp03852a1.pdf [file d3cp03852a1.pdf]

## Supporting Information

### **Pressure effects on both fluorescent emission and charge transport properties of organic semiconductors: A computational study**

Yi Zeng<sup>a</sup>, Wen Shi<sup>b</sup>, Qian Peng,<sup>c</sup> Yingli Niu<sup>d</sup>, Zhiying Ma<sup>e</sup>, Xiaoyan Zheng<sup>a\*</sup>

<sup>a</sup>Beijing Key Laboratory of Photoelectronic/Electrophotonic Conversion Materials, Key Laboratory of Cluster Science of Ministry of Education, School of Chemistry and Chemical Engineering, Beijing Institute of Technology, 100081 Beijing, China. E-mail: xiaoyanzheng@bit.edu.cn

<sup>b</sup>School of Chemistry, Sun Yat-sen University, Guangzhou, 510006, China.

<sup>c</sup>Key Laboratory of Organic Solids, Beijing National Laboratory for Molecular Science (BNLMS), Institute of Chemistry, Chinese Academy of Sciences, Beijing 100190, China.

<sup>d</sup>China.School of Science, Beijing Jiaotong University, Beijing 100044, China.

<sup>e</sup>Engineering Research Center for Nanomaterials, Henan University, Kaifeng 475004, China.

# List of Contents

## I. Computational details

1. Hole mobility calculations.

## II. Supplementary Figures S1-S6

**Fig. S1** Schematic representation of the charge hopping pathways from molecule A to its neighbors with probabilities  $p_1, p_2, \dots,$  and  $p_N$ .

**Fig. S2** Chemical Structures of COTh. The key structural parameters and the index of every atom were labeled, respectively.

**Fig. S3** Electron density contours of the HOMO and LUMO of COTh at 4.86 GPa.

**Fig. S4** The energy level of HOMO and LUMO at  $S_0$  and  $S_1$ , respectively.

**Fig. S5** The calculated  $\lambda_{gs}$  versus the normal-mode frequencies of the COTh aggregates under different pressure and diagrammatic illustration of selected normal modes with large  $\lambda_{gs}$  at 0 GPa.

**Fig. S6** The contributions to the  $\lambda_{gs}$  from bond length ( $\lambda_{bond}$ ), bond angle ( $\lambda_{angle}$ ) and dihedral angle ( $\lambda_{dihedral}$ ) under different pressure.

## III. Supplementary Tables S1-S12

**Table S1.** The lattice parameters ( $a, b, c, \alpha, \beta, \gamma$ ), density and volume of unit cell of COTh crystal under different external pressure.

**Table S2.** The calculated vertical excitation energy ( $\Delta E_{vert}$ ), wavelength and oscillator strength ( $f$ ) of COTh crystal based on the QM/MM models at  $S_0$  and  $S_1$  using several different functionals with basis set 6-31G(d,p), respectively.

**Table S3.** The calculated elastic constants of lattice parameters  $a, b, c$  for the COTh crystal.

**Table S4.** The intermolecular distance ( $\text{\AA}$ ) between the centroid COTh and its neighbors within 12  $\text{\AA}$ .

**Table S5.** Selected bond length ( $\text{\AA}$ ), bond angles (degree) and dihedral angles (degree) of COTh crystal at the  $S_0$  ( $S_1$ ) minimum and the modifications  $\Delta|S_0-S_1|$  between the two states at different pressure (GPa).

**Table S6.** The calculated vertical excitation energy ( $\Delta E_{vert}$ ), oscillator strength ( $f$ ), adiabatic excitation energy ( $\Delta E_{ad}$ ) and the transition orbital assignment for  $S_1$  of COTh molecules at crystal state under different pressure.

**Table S7.** The calculated spin-orbit coupling constants between  $S_1$  and triplet excited states for COTh crystals at 0 GPa and 4.86 GPa.

**Table S8.** The calculated  $k_r, k_{ic}, k_{eet}$  and fluorescence quantum efficiency  $\Phi_F$  for the COTh aggregates under different pressure.

**Table S9.** The calculated  $\lambda_{gs}, \lambda_{es}$  and  $\lambda_{total}$  of COTh in aggregates at different pressures.

**Table S10.** The maximum  $J_{max}$  among different dimers and spectral overlap  $I$  under different pressure for COTh crystals.

**Table S11.** The transfer integral  $V$  (meV) along different pathways under different pressure.

**Table S12.** The calculated charge reorganization energy  $\lambda_{charge}$  using normal mode analysis (NM) and adiabatic potential energy surface method (AP) at different pressure.

## I. Computational details

### 1. Hole mobility calculations.

The hopping model assumes that the carrier is localized at one position in the solid and jumps from one position to another by a series of incoherent jumps. Full quantum charge transfer rate is used in hopping models:<sup>1</sup>

$$k_{i \rightarrow f} = \frac{|V|^2}{\hbar^2} \int_{-\infty}^{\infty} dt \exp \left\{ - \sum_j S_j [(2\bar{n}_j + 1) - \bar{n}_j e^{-i\omega_j t} - (\bar{n}_j + 1)e^{i\omega_j t}] \right\} \quad (S1)$$

$$\bar{n}_j = \frac{1}{\left( e^{\frac{\hbar\omega_j}{k_B T}} - 1 \right)} \quad (S2)$$

where  $k_{i \rightarrow f}$  is the rate of charge transfer between two adjacent molecules  $i$  and  $f$ ,  $\hbar$  is the Plank constant and  $S_j$  measures the electron-phonon coupling strength between the carrier onsite energy and the  $j$ th intramolecular vibration mode,  $V$  is the transfer integral,  $\bar{n}_j$  is the occupation number for the  $j$ th phonon mode with vibrational frequency  $\omega_j$ .

The reorganization energy is mainly the change of energy caused by geometric relaxation during charge transfer, including external reorganization energy and internal reorganization energy. The external reorganization energy is caused by the interaction of the surrounding solvent molecules, and is related to the dielectric constant of the solvent. Compared with the internal reorganization energy, it is usually negligible. Internal reorganization energy comes from the change of molecular configuration before and after charge transfer between adjacent molecules. The methods for calculating internal recombination energy include adiabatic potential energy surface method<sup>2, 3</sup> and normal mode analysis method<sup>4, 5</sup>. In the adiabatic potential energy surface method, the calculation expression is as follows:

$$\lambda = [E_{\pm}(Q_N) - E_{\pm}(Q_{\pm})] + [E_N(Q_{\pm}) - E_N(Q_N)] \quad (S3)$$

Where  $E_{\pm}(Q_{\pm})$  and  $E_N(Q_N)$  is the total energy of the optimized ionic species and neutral molecule,  $E_{\pm}(Q_N)$  and  $E_N(Q_{\pm})$  represent the energies of the ionic and neutral species in the geometries of the neutral and ionic species, respectively.

Normal mode analysis assigns recombination energy to each vibration pattern. Its expression is:

$$\lambda = \sum \lambda_i = \sum \frac{k_i}{2} \Delta Q_i^2 = \sum \hbar \omega_i s_i \quad (S4)$$

Where  $\Delta Q_i$  represents the displacement along normal mode  $i$  between the equilibrium geometries of the neutral and charged molecules,  $k_i$  and  $\omega_i$  are the corresponding force constants and vibrational frequencies,  $s_i$  denotes the Huang-Rhys factor measuring charge-phonon coupling strength.

Transfer integrals describe the coupling of electrons before and after charge transfer. It depends on the position and shape of the orbitals between the neighboring molecules. It could be obtained from the site-energy overlap correction method and can be written as:<sup>6</sup>

$$V_{mn} = \frac{V_{mn}^0 - \frac{1}{2}(e_m + e_n)O_{mn}}{1 - O_m^2} \quad (S5)$$

$$e_m = \langle \Phi_m | H | \Phi_m \rangle \quad (S6)$$

$$V_{mn}^0 = \langle \Phi_m | F | \Phi_n \rangle \quad (S7)$$

$$O_{mn} = \langle \Phi_m | O | \Phi_n \rangle \quad (S8)$$

Where  $\Phi_m, \Phi_n$  represent the HOMOs or LUMOs of the neighboring molecules  $m$  and  $n$ .  $H$  and  $O$  are the dimer Hamiltonian and the overlap matrices, respectively. The B3P86/6-31G\*\* method is chosen for the calculation of transfer integrals by Gaussian program.

After the reorganization energy and transfer integral are obtained, the mobility of hopping  $\mu$ , can be evaluated from the Einstein relation.

$$\mu = \frac{e}{k_B T} D \quad (S9)$$

where  $e$  is the electronic charge and  $D$  is the diffusion coefficient, which is related to the charge transfer rate  $k$  as summing over all possible hopping ways. The random walk, which is a typical kind of Monte Carlo simulation was performed to obtain the diffusion coefficient. In detail, an arbitrary molecular site in the bulk system is initially chosen as the starting position for the charge. The charge then has a probability of  $p_i$  to hop to the  $i$ -th neighbor (see Figure R3). In practice, in order to determine the next site of the charge in a statistical sense, a random number  $\xi$  uniformly distributed between 0 and 1 is generated. If  $\sum_{i=1}^{b-1} p_i < \xi < \sum_{i=1}^b p_i$ , the charge hops to the  $b$ -th neighbor with a hopping time  $1/k_b$ , which assumes no correlation between the hopping events along different pathways. The simulation continues until the diffusion distance exceeds the lattice constant by at least 2–3 orders of magnitude. This process is repeated for thousands of times and averaged to get a linear relationship between the mean-square displacement (MSD) and the simulation time.

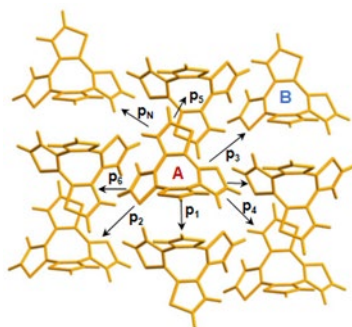

**Fig. S1** Schematic representation of the charge hopping pathways from molecule A to its neighbors with probabilities  $p_1, p_2, \dots$ , and  $p_N$ .

The diffusion coefficient can be approximately evaluated as:

$$D = \frac{1}{2n} \frac{dMSD}{dt} \quad (S10)$$

where  $n$  is the dimensionality (usually  $n=3$ ) of the system under investigation.

## II. Supplementary Figures S2-S6

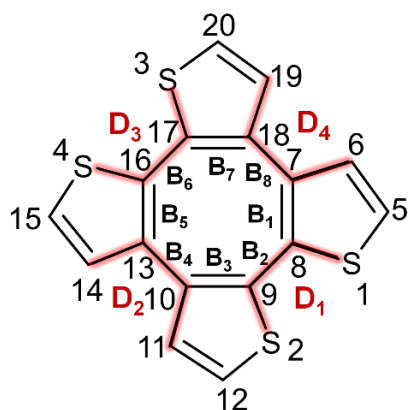

**Fig. S2** Chemical Structures of COTh. The key structural parameters and the index of every atom were labeled, respectively.

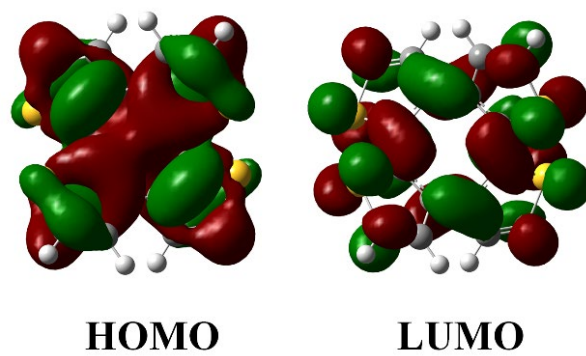

**Fig. S3** Electron density contours of the HOMO and LUMO of COTh at 4.86 GPa.

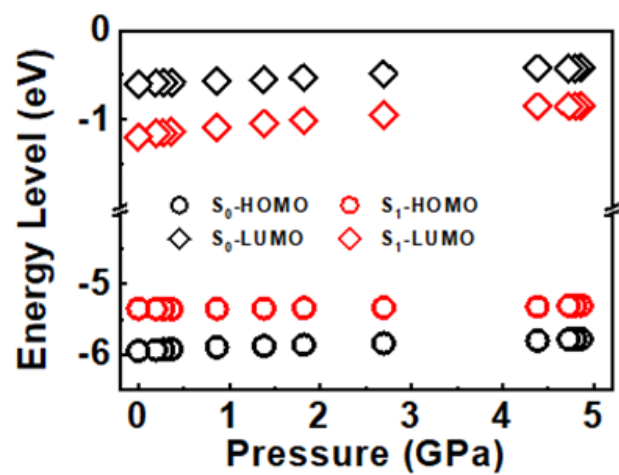

Fig. S4 The energy level of HOMO and LUMO at  $S_0$  and  $S_1$ , respectively.



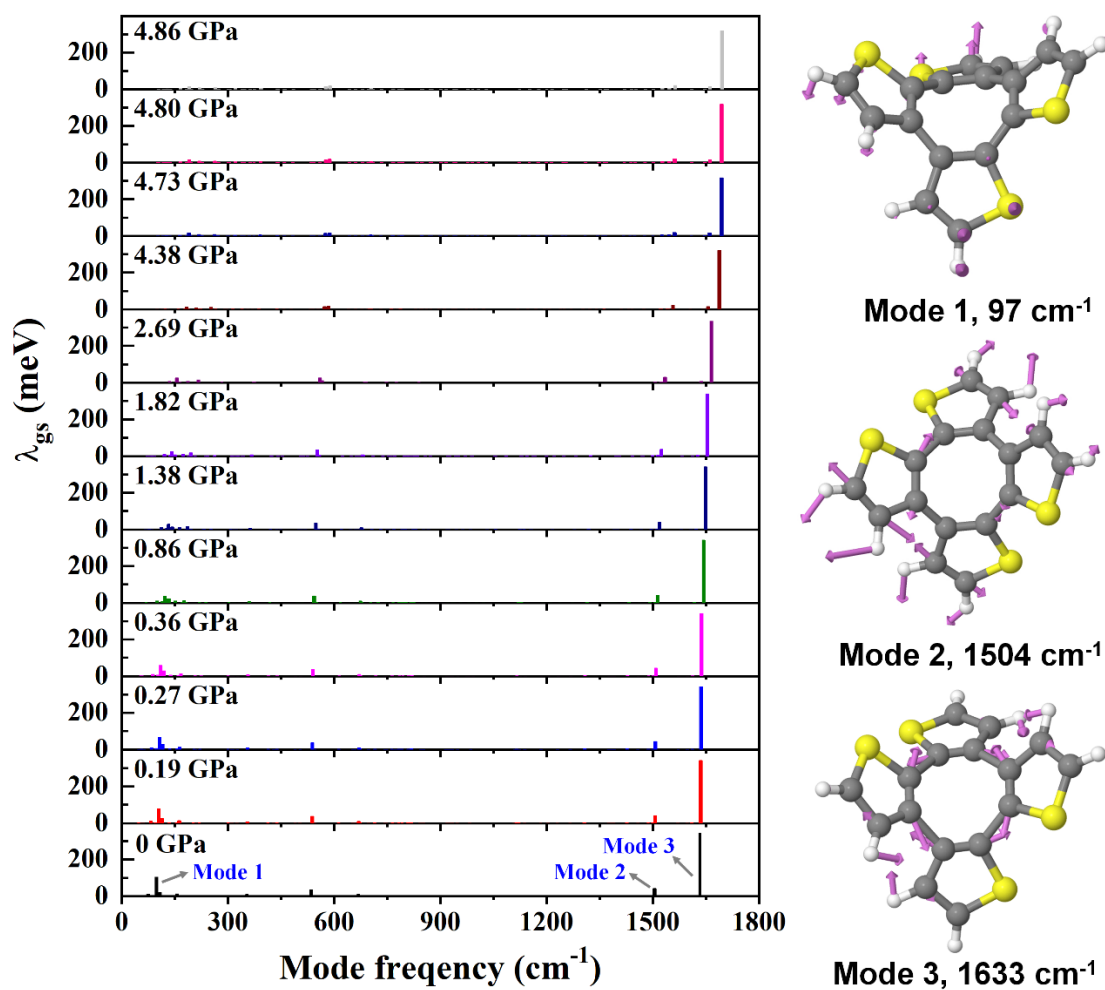

**Fig. S5** The calculated  $\lambda_{gs}$  versus the normal-mode frequencies of the COTh aggregates under different pressure and diagrammatic illustration of selected normal modes with large  $\lambda_{gs}$  at 0 GPa.

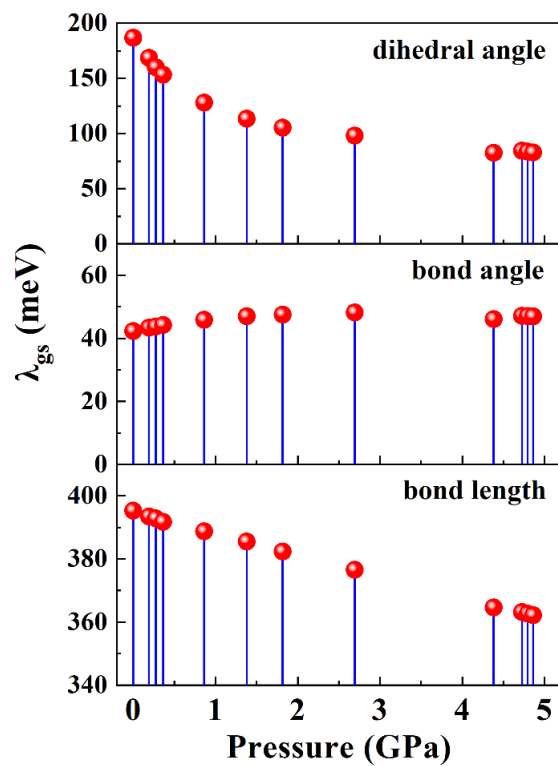

**Fig. S6** The contributions to the  $\lambda_{gs}$  from bond length ( $\lambda_{bond}$ ), bond angle ( $\lambda_{angle}$ ) and dihedral angle ( $\lambda_{dihedral}$ ) under different pressure.

### III. Supplementary Tables S1-S11

**Table S1.** The lattice parameters ( $a$ ,  $b$ ,  $c$ ,  $\alpha$ ,  $\beta$ ,  $\gamma$ ), density and volume of unit cell of COTh crystal under different external pressure.

| Pressure (GPa) | Lattice parameters |         |          |              |             |              | Density (g/cm <sup>3</sup> ) | Volume (Å <sup>3</sup> ) |
|----------------|--------------------|---------|----------|--------------|-------------|--------------|------------------------------|--------------------------|
|                | a (Å)              | b (Å)   | c (Å)    | $\alpha$ (°) | $\beta$ (°) | $\gamma$ (°) |                              |                          |
| 0              | 9.56150            | 7.30270 | 10.33760 | 90.00000     | 103.91600   | 90.00000     | 1.56                         | 700.635                  |
| 0.19           | 9.50542            | 7.23990 | 10.27764 | 90.00000     | 104.04395   | 90.00000     | 1.59                         | 686.149                  |
| 0.27           | 9.51692            | 7.21582 | 10.22038 | 89.99999     | 103.99799   | 90.00000     | 1.60                         | 681.016                  |
| 0.36           | 9.49290            | 7.18239 | 10.20249 | 90.00001     | 104.09165   | 90.00001     | 1.62                         | 674.690                  |
| 0.86           | 9.42262            | 7.07097 | 10.10359 | 90.00000     | 104.45564   | 90.00001     | 1.67                         | 651.861                  |
| 1.38           | 9.34901            | 6.99414 | 10.01769 | 89.99999     | 104.56544   | 89.99999     | 1.72                         | 633.987                  |
| 1.82           | 9.29158            | 6.93575 | 9.95332  | 89.99999     | 104.65126   | 89.99999     | 1.76                         | 620.575                  |
| 2.69           | 9.19096            | 6.84787 | 9.8313   | 89.99999     | 104.69466   | 90.00001     | 1.82                         | 598.528                  |
| 4.38           | 9.04348            | 6.71362 | 9.65295  | 89.99982     | 104.80173   | 89.99992     | 1.92                         | 566.625                  |
| 4.73           | 9.08378            | 6.63892 | 9.62959  | 90.00035     | 105.17818   | 90.00008     | 1.95                         | 560.469                  |
| 4.80           | 9.07768            | 6.63421 | 9.62642  | 90.00003     | 105.19045   | 89.99998     | 1.95                         | 559.478                  |
| 4.86           | 9.07329            | 6.63085 | 9.62177  | 90.00031     | 105.20629   | 90.00026     | 1.95                         | 558.613                  |

**Table S2.** The calculated vertical excitation energy ( $\Delta E_{\text{vert}}$ ), and oscillator strength ( $f$ ) of COTh crystal based on the QM/MM models at  $S_0$  and  $S_1$  using several different functionals with basis set 6-31G(d,p), respectively.

|                     | Absorption ( $S_0$ )     |               | Emission ( $S_1$ )       |               |
|---------------------|--------------------------|---------------|--------------------------|---------------|
|                     | $\Delta E_{\text{vert}}$ | $f$           | $\Delta E_{\text{vert}}$ | $f$           |
| Exper. <sup>7</sup> |                          |               | 2.38 eV / 520 nm         |               |
| B3LYP               | 3.21 eV / 386 nm         | 0.0075        | 2.17 eV / 571 nm         | 0.0037        |
| M06                 | 3.26 eV / 381 nm         | 0.0080        | 2.20 eV / 562 nm         | 0.0036        |
| <b>BMK</b>          | <b>3.53 eV / 351 nm</b>  | <b>0.0093</b> | <b>2.31 eV / 536 nm</b>  | <b>0.0038</b> |
| BHandHLYP           | 3.80 eV / 326 nm         | 0.0115        | 2.43 eV / 509 nm         | 0.0040        |
| M062X               | 3.76 eV / 330 nm         | 0.009         | 2.46 eV / 504 nm         | 0.0033        |
| M052X               | 3.81 eV / 326 nm         | 0.0089        | 2.49 eV / 498 nm         | 0.0033        |
| CAM-B3LYP           | 3.76 eV / 330 nm         | 0.0105        | 2.45 eV / 505 nm         | 0.0038        |
| $\omega$ B97XD      | 3.80 eV / 327 nm         | 0.011         | 2.50 eV / 496 nm         | 0.0038        |
| LC- $\omega$ HPBE   | 4.21 eV / 295 nm         | 0.0126        | 2.77 eV / 447 nm         | 0.0038        |

**Table S3.** The calculated elastic constants of lattice parameters  $a$ ,  $b$ ,  $c$  for the COTh crystal.

| Elastic constant (GPa) |          |
|------------------------|----------|
| $a$                    | 36.78082 |
| $b$                    | 27.66738 |
| $b$                    | 29.32226 |

To calculate the elastic constant  $C_{ii}$ , we stretched the unit cell of along the  $a$ -,  $b$ -, and  $c$ -directions, respectively, by  $\pm 0.5\%$ ,  $\pm 1.0\%$ ,  $\pm 1.5\%$ , and  $\pm 2.0\%$ , and calculate the total energy change due to the unit-cell deformation. The elastic constant  $C_{ii}$  can be obtained by fitting the total energy  $E$  with respect to the dilation  $\Delta l/l_0$ , using the formula:

$$\frac{E - E_0}{V_0} = C_{ii} \frac{(\Delta l/l_0)^2}{2}$$

Here,  $V_0$  and  $E_0$  are, respectively, the volume and total energy of the unit cell at equilibrium.  $\Delta l$  is the change of lattice constant along the direction  $ii$  ( $i = a, b, c$ ), and  $l_0$  is its value at equilibrium. The elastic constants were calculated through first-principles calculations in Vienna Ab initio Simulation Package.

**Table S4.** The intermolecular distance (Å) between the centroid COTh and its neighbors within 12 Å.

| Pressure (GPa) | 1,1' | 2,2' | 3,3' | 4,4'  | 5,5' | 6,6' | 7,7' |
|----------------|------|------|------|-------|------|------|------|
| 0              | 7.11 | 9.39 | 7.30 | 10.34 | 9.56 | 7.27 | 7.92 |
| 0.19           | 7.06 | 9.34 | 7.24 | 10.28 | 9.51 | 7.21 | 7.87 |
| 0.27           | 7.07 | 9.34 | 7.22 | 10.22 | 9.52 | 7.17 | 7.83 |
| 0.36           | 7.04 | 9.31 | 7.18 | 10.20 | 9.49 | 7.15 | 7.82 |
| 0.86           | 6.95 | 9.25 | 7.07 | 10.10 | 9.42 | 7.05 | 7.74 |
| 1.38           | 6.89 | 9.18 | 6.99 | 10.02 | 9.35 | 6.98 | 7.68 |
| 1.82           | 6.83 | 9.13 | 6.94 | 9.95  | 9.29 | 6.93 | 7.63 |
| 2.69           | 6.75 | 9.01 | 6.85 | 9.83  | 9.19 | 6.85 | 7.55 |
| 4.38           | 6.62 | 8.86 | 6.71 | 9.65  | 9.04 | 6.72 | 7.42 |
| 4.73           | 6.58 | 8.86 | 6.64 | 9.63  | 9.08 | 6.68 | 7.44 |
| 4.80           | 6.58 | 8.86 | 6.63 | 9.63  | 9.08 | 6.68 | 7.43 |
| 4.86           | 6.58 | 8.86 | 6.63 | 9.62  | 9.07 | 6.67 | 7.42 |

**Table S5.** Selected bond length (Å), bond angles (degree) and dihedral angles (degree) of COTh crystal at the  $S_0$  ( $S_1$ ) minimum and the modifications  $\Delta|S_0-S_1|$  between the two states at different pressure (GPa).

|                      | Pressure    | 0     |       |                   | 0.19  |       |                   | 0.27  |       |                   | 0.36  |       |                   | 0.86  |       |                   | 1.38  |       |                   | Exper. <sup>7</sup> |
|----------------------|-------------|-------|-------|-------------------|-------|-------|-------------------|-------|-------|-------------------|-------|-------|-------------------|-------|-------|-------------------|-------|-------|-------------------|---------------------|
|                      |             | $S_0$ | $S_1$ | $\Delta S_0-S_1 $ |                     |
| <b>B<sub>1</sub></b> | 7-8         | 1.38  | 1.44  | 0.06              | 1.38  | 1.44  | 0.06              | 1.38  | 1.44  | 0.06              | 1.38  | 1.44  | 0.06              | 1.38  | 1.44  | 0.06              | 1.38  | 1.44  | 0.06              | 1.4                 |
| <b>B<sub>2</sub></b> | 8-9         | 1.47  | 1.41  | 0.06              | 1.47  | 1.41  | 0.06              | 1.46  | 1.41  | 0.06              | 1.46  | 1.41  | 0.06              | 1.47  | 1.41  | 0.06              | 1.47  | 1.41  | 0.06              | 1.46                |
| <b>B<sub>3</sub></b> | 9-10        | 1.38  | 1.44  | 0.05              | 1.38  | 1.44  | 0.05              | 1.38  | 1.43  | 0.05              | 1.38  | 1.43  | 0.05              | 1.38  | 1.44  | 0.05              | 1.38  | 1.44  | 0.05              | 1.4                 |
| <b>B<sub>4</sub></b> | 10-13       | 1.48  | 1.43  | 0.05              | 1.48  | 1.43  | 0.05              | 1.48  | 1.43  | 0.05              | 1.48  | 1.42  | 0.05              | 1.48  | 1.43  | 0.05              | 1.48  | 1.43  | 0.05              | 1.47                |
| <b>B<sub>5</sub></b> | 13-16       | 1.38  | 1.44  | 0.05              | 1.38  | 1.43  | 0.04              | 1.38  | 1.43  | 0.05              | 1.38  | 1.43  | 0.05              | 1.38  | 1.44  | 0.05              | 1.38  | 1.43  | 0.04              | 1.39                |
| <b>B<sub>6</sub></b> | 16-17       | 1.47  | 1.41  | 0.06              | 1.47  | 1.43  | 0.04              | 1.46  | 1.41  | 0.06              | 1.46  | 1.41  | 0.05              | 1.47  | 1.41  | 0.06              | 1.47  | 1.43  | 0.04              | 1.46                |
| <b>B<sub>7</sub></b> | 17-18       | 1.38  | 1.44  | 0.06              | 1.38  | 1.44  | 0.06              | 1.38  | 1.43  | 0.05              | 1.38  | 1.43  | 0.05              | 1.38  | 1.44  | 0.06              | 1.38  | 1.44  | 0.06              | 1.39                |
| <b>B<sub>8</sub></b> | 18-7        | 1.48  | 1.43  | 0.05              | 1.48  | 1.43  | 0.05              | 1.48  | 1.42  | 0.05              | 1.47  | 1.42  | 0.05              | 1.48  | 1.43  | 0.05              | 1.48  | 1.43  | 0.05              | 1.47                |
|                      | 7-8-9       | 129.5 | 129.2 | 0.3               | 129.5 | 129.1 | 0.3               | 129.4 | 129.0 | 0.5               | 129.2 | 128.7 | 0.5               | 129.5 | 129.2 | 0.3               | 129.5 | 129.1 | 0.3               | 129.9               |
|                      | 8-9-10      | 130.8 | 130.5 | 0.3               | 130.8 | 130.5 | 0.3               | 131.1 | 130.5 | 0.6               | 131.3 | 130.6 | 0.7               | 130.8 | 130.5 | 0.3               | 130.8 | 130.5 | 0.3               | 130.2               |
|                      | 8-7-18      | 126.1 | 126.9 | 0.8               | 126.1 | 126.8 | 0.7               | 126.2 | 126.7 | 0.4               | 126.3 | 126.5 | 0.2               | 126.1 | 126.9 | 0.8               | 126.1 | 126.8 | 0.7               | 125.8               |
|                      | 7-18-17     | 125.4 | 126.3 | 0.9               | 125.4 | 126.2 | 0.8               | 125.6 | 126.1 | 0.6               | 125.7 | 126.1 | 0.4               | 125.4 | 126.3 | 0.9               | 125.4 | 126.2 | 0.8               | 125.3               |
|                      | 18-7-8-9    | 5.4   | 6.9   | 1.4               | 5.7   | 7.0   | 1.3               | 6.4   | 7.4   | 1.0               | 7.3   | 7.9   | 0.6               | 5.4   | 6.9   | 1.4               | 5.7   | 7.0   | 1.3               | 2.0                 |
|                      | 8-9-10-13   | -1.2  | -2.4  | 1.2               | -1.5  | -2.6  | 1.1               | -1.9  | -2.6  | 0.8               | -2.4  | -2.9  | 0.5               | -1.2  | -2.4  | 1.2               | -1.5  | -2.6  | 1.1               | -0.3                |
|                      | 10-13-16-17 | 5.2   | 7.3   | 2.2               | 5.5   | 7.6   | 2.2               | 6.4   | 8.3   | 1.9               | 7.1   | 8.9   | 1.8               | 5.2   | 7.3   | 2.2               | 5.5   | 7.6   | 2.2               | 4.0                 |
|                      | 16-17-18-7  | 0.0   | -0.3  | 0.3               | 0.0   | -0.3  | 0.3               | 0.0   | -0.1  | 0.1               | 0.4   | 0.2   | 0.2               | 0.0   | -0.3  | 0.3               | 0.0   | -0.3  | 0.3               | 0.8                 |
| <b>D<sub>1</sub></b> | 1-8-9-2     | -48.4 | -37.3 | 11.1              | -48.3 | -37.5 | 10.8              | -47.9 | -38.1 | 9.8               | -47.8 | -38.8 | 9.1               | -48.4 | -37.3 | 11.1              | -48.3 | -37.5 | 10.8              | -47.2               |
| <b>D<sub>2</sub></b> | 11-10-13-14 | 45.3  | 35.3  | 9.9               | 45.4  | 35.7  | 9.7               | 45.6  | 36.6  | 8.9               | 46.5  | 37.9  | 8.6               | 45.3  | 35.3  | 9.9               | 45.4  | 35.7  | 9.7               | 44.0                |
| <b>D<sub>3</sub></b> | 4-16-17-3   | -47.7 | -37.6 | 10.1              | -47.8 | -38.0 | 9.7               | -47.5 | -39.0 | 8.5               | -47.7 | -40.0 | 7.7               | -47.7 | -37.6 | 10.1              | -47.8 | -38.0 | 9.7               | -48.4               |
| <b>D<sub>4</sub></b> | 19-18-7-6   | 41.1  | 31.6  | 9.4               | 40.8  | 31.8  | 9.0               | 39.8  | 32.0  | 7.8               | 38.8  | 31.8  | 6.9               | 41.1  | 31.6  | 9.4               | 40.8  | 31.8  | 9.0               | 42.4                |

(continuous)

**Table S5.** Selected bond length (Å), bond angles (degree) and dihedral angles (degree) of COTh crystal at the  $S_0$  ( $S_1$ ) minimum and the modifications  $\Delta|S_0-S_1|$  between the two states at different pressure (GPa).

|                      | Pressure    | 1.82  |       |                   | 2.69  |       |                   | 4.38  |       |                   | 4.73  |       |                   | 4.80  |       |                   | 4.86  |       |                   |
|----------------------|-------------|-------|-------|-------------------|-------|-------|-------------------|-------|-------|-------------------|-------|-------|-------------------|-------|-------|-------------------|-------|-------|-------------------|
|                      |             | $S_0$ | $S_1$ | $\Delta S_0-S_1 $ |
| <b>B<sub>1</sub></b> | 7-8         | 1.38  | 1.43  | <b>0.06</b>       | 1.38  | 1.43  | <b>0.05</b>       | 1.37  | 1.43  | <b>0.05</b>       |
| <b>B<sub>2</sub></b> | 8-9         | 1.46  | 1.41  | <b>0.06</b>       | 1.46  | 1.40  | <b>0.05</b>       | 1.45  | 1.39  | <b>0.05</b>       |
| <b>B<sub>3</sub></b> | 9-10        | 1.38  | 1.43  | <b>0.05</b>       |
| <b>B<sub>4</sub></b> | 10-13       | 1.48  | 1.42  | <b>0.05</b>       | 1.47  | 1.42  | <b>0.05</b>       |
| <b>B<sub>5</sub></b> | 13-16       | 1.38  | 1.43  | <b>0.05</b>       | 1.38  | 1.43  | <b>0.05</b>       | 1.37  | 1.42  | <b>0.05</b>       |
| <b>B<sub>6</sub></b> | 16-17       | 1.46  | 1.41  | <b>0.05</b>       | 1.46  | 1.40  | <b>0.05</b>       | 1.45  | 1.40  | <b>0.05</b>       |
| <b>B<sub>7</sub></b> | 17-18       | 1.38  | 1.43  | <b>0.05</b>       | 1.38  | 1.43  | <b>0.05</b>       | 1.37  | 1.42  | <b>0.05</b>       |
| <b>B<sub>8</sub></b> | 18-7        | 1.47  | 1.42  | <b>0.05</b>       | 1.47  | 1.42  | <b>0.05</b>       | 1.46  | 1.41  | <b>0.05</b>       | 1.46  | 1.41  | <b>0.05</b>       | 1.45  | 1.41  | <b>0.05</b>       | 1.45  | 1.41  | <b>0.05</b>       |
|                      | 7-8-9       | 129.1 | 128.5 | <b>0.6</b>        | 128.7 | 128.0 | <b>0.7</b>        | 128.0 | 127.3 | <b>0.7</b>        | 128.4 | 127.7 | <b>0.7</b>        | 128.4 | 127.6 | <b>0.7</b>        | 128.3 | 127.6 | <b>0.7</b>        |
|                      | 8-9-10      | 131.5 | 130.7 | <b>0.8</b>        | 131.9 | 131.0 | <b>0.9</b>        | 132.6 | 131.6 | <b>1.0</b>        | 132.7 | 131.7 | <b>1.0</b>        | 132.8 | 131.8 | <b>1.0</b>        | 132.8 | 131.8 | <b>1.0</b>        |
|                      | 8-7-18      | 126.3 | 126.4 | <b>0.1</b>        | 126.4 | 126.3 | <b>0.1</b>        | 126.6 | 126.3 | <b>0.4</b>        | 126.9 | 126.5 | <b>0.4</b>        | 126.9 | 126.5 | <b>0.4</b>        | 126.9 | 126.4 | <b>0.4</b>        |
|                      | 7-18-17     | 125.9 | 126.2 | <b>0.3</b>        | 126.1 | 126.2 | <b>0.1</b>        | 126.6 | 126.6 | <b>0.0</b>        | 126.9 | 126.9 | <b>0.0</b>        | 126.9 | 126.9 | <b>0.0</b>        | 127.0 | 127.0 | <b>0.0</b>        |
|                      | 18-7-8-9    | 8.1   | 8.4   | <b>0.3</b>        | 9.7   | 9.7   | <b>0.0</b>        | 12.2  | 11.7  | <b>0.5</b>        | 11.5  | 11.1  | <b>0.4</b>        | 11.6  | 11.1  | <b>0.5</b>        | 11.7  | 11.2  | <b>0.5</b>        |
|                      | 8-9-10-13   | -2.8  | -3.0  | <b>0.2</b>        | -4.0  | -3.8  | <b>0.2</b>        | -5.5  | -4.6  | <b>0.9</b>        | -6.4  | -5.3  | <b>1.1</b>        | -6.3  | -5.1  | <b>1.1</b>        | -6.1  | -5.0  | <b>1.1</b>        |
|                      | 10-13-16-17 | 7.7   | 9.5   | <b>1.8</b>        | 9.1   | 10.9  | <b>1.8</b>        | 10.9  | 12.7  | <b>1.8</b>        | 11.0  | 12.8  | <b>1.8</b>        | 11.0  | 12.8  | <b>1.8</b>        | 11.0  | 12.8  | <b>1.8</b>        |
|                      | 16-17-18-7  | 0.7   | 0.5   | <b>0.2</b>        | 1.2   | 0.9   | <b>0.3</b>        | 3.0   | 2.4   | <b>0.6</b>        | 3.8   | 3.3   | <b>0.6</b>        | 4.0   | 3.4   | <b>0.5</b>        | 4.2   | 3.6   | <b>0.5</b>        |
| <b>D<sub>1</sub></b> | 1-8-9-2     | -47.8 | -39.2 | <b>8.6</b>        | -47.9 | -39.8 | <b>8.0</b>        | -47.9 | -40.9 | <b>7.0</b>        | -46.4 | -39.6 | <b>6.8</b>        | -46.5 | -39.7 | <b>6.8</b>        | -46.5 | -39.7 | <b>6.8</b>        |
| <b>D<sub>2</sub></b> | 11-10-13-14 | 47.2  | 38.9  | <b>8.3</b>        | 49.1  | 41.0  | <b>8.2</b>        | 52.7  | 44.7  | <b>8.0</b>        | 53.0  | 45.1  | <b>7.9</b>        | 53.0  | 45.2  | <b>7.8</b>        | 53.1  | 45.2  | <b>7.8</b>        |
| <b>D<sub>3</sub></b> | 4-16-17-3   | -47.8 | -40.5 | <b>7.3</b>        | -48.5 | -41.8 | <b>6.7</b>        | -49.2 | -43.1 | <b>6.1</b>        | -49.4 | -43.3 | <b>6.0</b>        | -49.3 | -43.3 | <b>6.0</b>        | -49.3 | -43.3 | <b>6.0</b>        |
| <b>D<sub>4</sub></b> | 19-18-7-6   | 37.9  | 31.5  | <b>6.4</b>        | 36.3  | 30.9  | <b>5.5</b>        | 33.0  | 28.4  | <b>4.6</b>        | 32.4  | 28.0  | <b>4.4</b>        | 32.2  | 27.9  | <b>4.4</b>        | 32.1  | 27.7  | <b>-4.4</b>       |



**Table S6.** The calculated vertical excitation energy ( $\Delta E_{\text{vert}}$ ), oscillator strength ( $f$ ), adiabatic excitation energy ( $\Delta E_{\text{ad}}$ ) and the transition orbital assignment for  $S_1$  of COTh molecules at crystal state under different pressure.

| Pressure (GPa) | $\Delta E_{\text{vert}}$ (eV) | $f$    | $\Delta E_{\text{ad}}$ (eV) | Transition orbital assignment |
|----------------|-------------------------------|--------|-----------------------------|-------------------------------|
| 0              | 2.313                         | 0.0038 | 2.858                       | HOMO→LUMO 99.18%              |
| 0.19           | 2.350                         | 0.0039 | 2.884                       | HOMO→LUMO 99.15%              |
| 0.27           | 2.357                         | 0.0040 | 2.887                       | HOMO→LUMO 99.15%              |
| 0.36           | 2.372                         | 0.0041 | 2.898                       | HOMO→LUMO 99.13%              |
| 0.86           | 2.411                         | 0.0042 | 2.924                       | HOMO→LUMO 99.11%              |
| 1.38           | 2.451                         | 0.0044 | 2.951                       | HOMO→LUMO 99.08%              |
| 1.82           | 2.479                         | 0.0045 | 2.970                       | HOMO→LUMO 99.05%              |
| 2.69           | 2.534                         | 0.0049 | 3.007                       | HOMO→LUMO 99.00%              |
| 4.38           | 2.615                         | 0.0058 | 3.052                       | HOMO→LUMO 98.88%              |
| 4.73           | 2.604                         | 0.0063 | 3.039                       | HOMO→LUMO 98.84%              |
| 4.80           | 2.606                         | 0.0063 | 3.039                       | HOMO→LUMO 98.84%              |
| 4.86           | 2.610                         | 0.0063 | 3.041                       | HOMO→LUMO 98.84%              |

**Table S7.** The calculated spin-orbit coupling constants between  $S_1$  and triplet excited states for COTh crystals at 0 GPa and 4.86 GPa.

| Pressure (GPa) | SOC ( $\text{cm}^{-1}$ ) |
|----------------|--------------------------|
| 0              | 1.1                      |
| 4.86           | 1.4                      |

**Table S8.** The calculated  $k_r$ ,  $k_{ic}$ ,  $k_{cet}$  and fluorescence quantum efficiency  $\Phi_F$  for the COTh aggregates under different pressure.

| Pressure (GPa) | $k_r(10^6 \text{ s}^{-1})$ | $k_{ic}(10^6 \text{ s}^{-1})$ | $k_{cet} (10^6 \text{ s}^{-1})$ | $\Phi_F$ |
|----------------|----------------------------|-------------------------------|---------------------------------|----------|
| 0              | 0.882                      | 29.65                         | 20.04                           | 1.74%    |
| 0.19           | 0.934                      | 18.07                         | 38.48                           | 1.63%    |
| 0.27           | 0.964                      | 15.82                         | 52.23                           | 1.40%    |
| 0.36           | 1.002                      | 12.86                         | 66.34                           | 1.25%    |
| 0.86           | 1.060                      | 8.001                         | 157.2                           | 0.64%    |
| 1.38           | 1.147                      | 5.673                         | 293.6                           | 0.38%    |
| 1.82           | 1.200                      | 5.037                         | 518.3                           | 0.23%    |
| 2.69           | 1.366                      | 8.846                         | 1669                            | 0.08%    |
| 4.38           | 1.721                      | 9.613                         | 2630                            | 0.07%    |
| 4.73           | 1.854                      | 2.114                         | 1527                            | 0.12%    |
| 4.80           | 1.857                      | 1.996                         | 1580                            | 0.12%    |
| 4.86           | 1.862                      | 1.932                         | 1607                            | 0.12%    |

**Table S9.** The calculated  $\lambda_{\text{gs}}$ ,  $\lambda_{\text{es}}$  and  $\lambda_{\text{total}}$  of COTh in aggregates at different pressures.

| Pressure (GPa) | $\lambda_{\text{gs}}$ (meV) | $\lambda_{\text{es}}$ (meV) | $\lambda_{\text{total}}$ (meV) |
|----------------|-----------------------------|-----------------------------|--------------------------------|
| 0              | 639                         | 650                         | 1289                           |
| 0.19           | 619                         | 618                         | 1237                           |
| 0.27           | 612                         | 606                         | 1218                           |
| 0.36           | 604                         | 594                         | 1197                           |
| 0.86           | 577                         | 557                         | 1134                           |
| 1.38           | 559                         | 532                         | 1090                           |
| 1.82           | 546                         | 516                         | 1062                           |
| 2.69           | 528                         | 495                         | 1023                           |
| 4.38           | 502                         | 464                         | 966                            |
| 4.73           | 499                         | 462                         | 961                            |
| 4.80           | 498                         | 461                         | 959                            |
| 4.86           | 496                         | 459                         | 955                            |

**Table S10.** The maximum  $J_{\max}$  among different dimers and spectral overlap  $I$  under different pressure for COTh crystals.

| Pressure (GPa) | $J_{\max}$ (meV) | $I$ (meV <sup>-1</sup> ) |
|----------------|------------------|--------------------------|
| 0              | 1.894            | 0.585                    |
| 0.19           | 1.963            | 1.050                    |
| 0.27           | 1.994            | 1.380                    |
| 0.36           | 2.006            | 1.730                    |
| 0.86           | 2.069            | 3.850                    |
| 1.38           | 2.118            | 6.860                    |
| 1.82           | 2.174            | 11.490                   |
| 2.69           | 2.418            | 29.890                   |
| 4.38           | 2.772            | 33.880                   |
| 4.73           | 2.981            | 17.990                   |
| 4.80           | 2.985            | 18.580                   |
| 4.86           | 2.960            | 19.210                   |

**Table S11.** The transfer integral  $V$  (meV) along different pathways under different pressure.

| Pressure (GPa) | 1,1' | 2,2' | 3,3' | 4,4' | 5,5' | 6,6' | 7,7' |
|----------------|------|------|------|------|------|------|------|
| 0              | 41.1 | 19.2 | 2.0  | 1.1  | 6.0  | 6.5  | 2.1  |
| 0.19           | 43.4 | 20.6 | 1.0  | 1.3  | 6.4  | 7.2  | 2.8  |
| 0.27           | 40.2 | 21.0 | 0.2  | 1.3  | 6.3  | 7.3  | 3.9  |
| 0.36           | 42.4 | 21.8 | 0.4  | 1.4  | 6.4  | 7.8  | 3.8  |
| 0.86           | 45.5 | 24.1 | 3.4  | 1.4  | 7.2  | 9.7  | 4.8  |
| 1.38           | 49.3 | 26.4 | 5.1  | 1.5  | 7.5  | 11.2 | 6.1  |
| 1.82           | 52.1 | 28.2 | 6.6  | 1.6  | 7.8  | 12.6 | 7.0  |
| 2.69           | 59.8 | 31.8 | 8.6  | 1.8  | 7.8  | 14.9 | 8.4  |
| 4.38           | 69.9 | 37.5 | 12.0 | 2.1  | 7.4  | 19.0 | 11.5 |
| 4.73           | 70.3 | 39.7 | 15.7 | 1.8  | 7.3  | 21.5 | 10.6 |
| 4.80           | 70.1 | 39.8 | 15.9 | 1.8  | 7.4  | 21.8 | 10.9 |
| 4.86           | 70.4 | 39.9 | 16.0 | 1.8  | 7.5  | 22.0 | 11.2 |

**Table S12.** The calculated charge reorganization energy  $\lambda_{\text{charge}}$  using normal mode analysis (NM) and adiabatic potential energy surface method (AP) at different pressure.

| Pressure | $\lambda_{\text{charge}}$ |     |
|----------|---------------------------|-----|
|          | AP                        | NM  |
| 0        | 314                       | 330 |
| 0.19     | 306                       | 320 |
| 0.27     | 302                       | 315 |
| 0.36     | 298                       | 310 |
| 0.86     | 287                       | 298 |
| 1.38     | 280                       | 290 |
| 1.82     | 275                       | 284 |
| 2.69     | 267                       | 276 |
| 4.38     | 257                       | 265 |
| 4.73     | 256                       | 266 |
| 4.80     | 256                       | 265 |
| 4.86     | 256                       | 264 |

## Reference

1. G. Nan, X. Yang, L. Wang, Z. Shuai and Y. Zhao, *Phys. Rev. B*, 2009, **79**, 115203.
2. M. Malagoli and J. L. Brédas, *Chem. Phys. Lett.*, 2000, **327**, 13-17.
3. V. Lemaire, D. A. da Silva Filho, V. Coropceanu, M. Lehmann, Y. Geerts, J. Piris, M. G. Debije, A. M. van de Craats, K. Senthilkumar, L. D. A. Siebbeles, J. M. Warman, J.-L. Brédas and J. Cornil, *J. Am. Chem. Soc.*, 2004, **126**, 3271-3279.
4. O. Kwon, V. Coropceanu, N. E. Gruhn, J. C. Durivage, J. G. Laquindanum, H. E. Katz, J. Cornil and J. L. Brédas, *J. Chem. Phys.*, 2004, **120**, 8186-8194.
5. R. S. Sánchez-Carrera, V. Coropceanu, D. A. da Silva Filho, R. Friedlein, W. Osikowicz, R. Murdey, C. Suess, W. R. Salaneck and J.-L. Brédas, *J. Phys. Chem. B*, 2006, **110**, 18904-18911.
6. E. F. Valeev, V. Coropceanu, D. A. da Silva Filho, S. Salman and J.-L. Brédas, *J. Am. Chem. Soc.*, 2006, **128**, 9882-9886.
7. Z. Zhao, X. Zheng, L. Du, Y. Xiong, W. He, X. Gao, C. Li, Y. Liu, B. Xu, J. Zhang, F. Song, Y. Yu, X. Zhao, Y. Cai, X. He, R. T. K. Kwok, J. W. Y. Lam, X. Huang, D. Lee Phillips, H. Wang and B. Z. Tang, *Nat. Commun.*, 2019, **10**, 2952.
